# Supplementary material for: Ghrelin Receptor Influence on Cocaine Reward is Not Directly Dependent on Peripheral Acyl-Ghrelin
Source: PubMed Central journal article supplement (PMC6372697; doi:10.1038/s41598-019-38549-z), 2019-02-12
Supplement: 41598_2019_38549_MOESM1_ESM.pdf [file 41598_2019_38549_MOESM1_ESM.pdf]

## **SUPPLEMENTAL INFORMATION**

### **TITLE**

Ghrelin Receptor Influence on Cocaine Reward is Not Directly Dependent on Peripheral Acyl-Ghrelin

### **AUTHORS**

Cody J Wenthur, Ritika Gautam, Bin Zhou, Leandro F Vendruscolo, Lorenzo Leggio, Kim D Janda

Supplemental Table 1. Ghr1 Copy Number Following Bioconjugation to Bovine Serum Albumin

| <b>Species</b> | <b>Replicate</b> | <b>Mass</b>  | <b>Diff. from BSA</b> | <b>Copy #</b> |
|----------------|------------------|--------------|-----------------------|---------------|
| <i>BSA</i>     |                  | <i>66463</i> |                       |               |
| Ghr1-BSA       | 1                | 72579        | 6116                  | 5             |
| Ghr1-BSA       | 2                | 83159        | 16696                 | 13            |
| Ghr1-BSA       | 3                | 79085        | 12622                 | 10            |

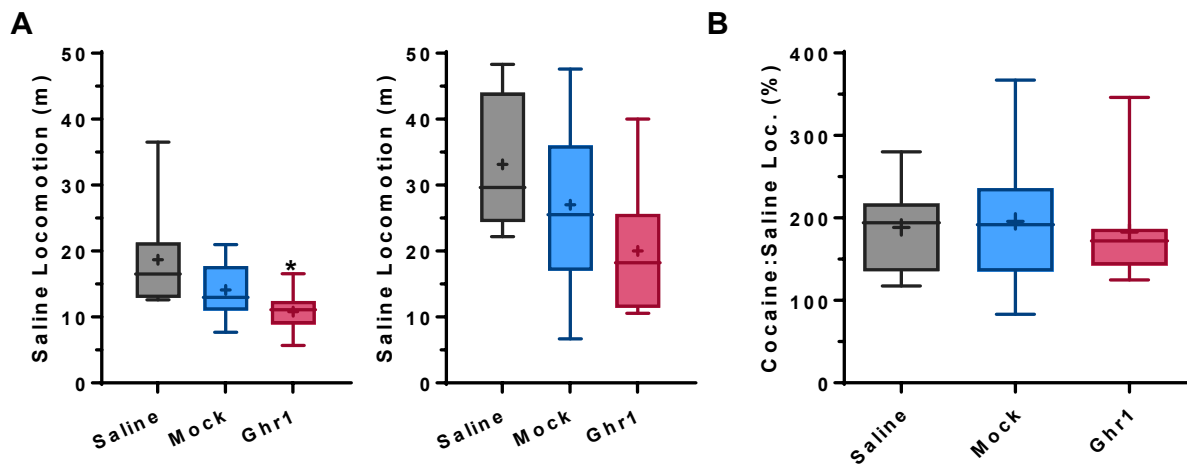

Supplemental Figure 1. Locomotor effects of vaccination against ghrelin. A) Locomotor activity after treatment with saline [One-way ANOVA ( $P = 0.0173$ ,  $F_{2,27} = 4.73$ , \*  $p < 0.05$  vs. Saline, Bonferroni correction)] or cocaine (20 mg/kg; [One-way ANOVA ( $P = 0.0547$ ,  $F_{2,27} = 3.24$ )] in the presence of saline pretreatment ( $n = 8$ ), vaccination with KLH ( $n = 9$ ), or Ghr1-KLH ( $n = 9$ ). B) Percent increase in cocaine locomotion compared to saline baseline [One-way ANOVA ( $P = 0.9145$ ,  $F_{2,27} = 0.09$ )]. Data are shown as median with quartiles  $\pm$  5-95% CI; +, mean.

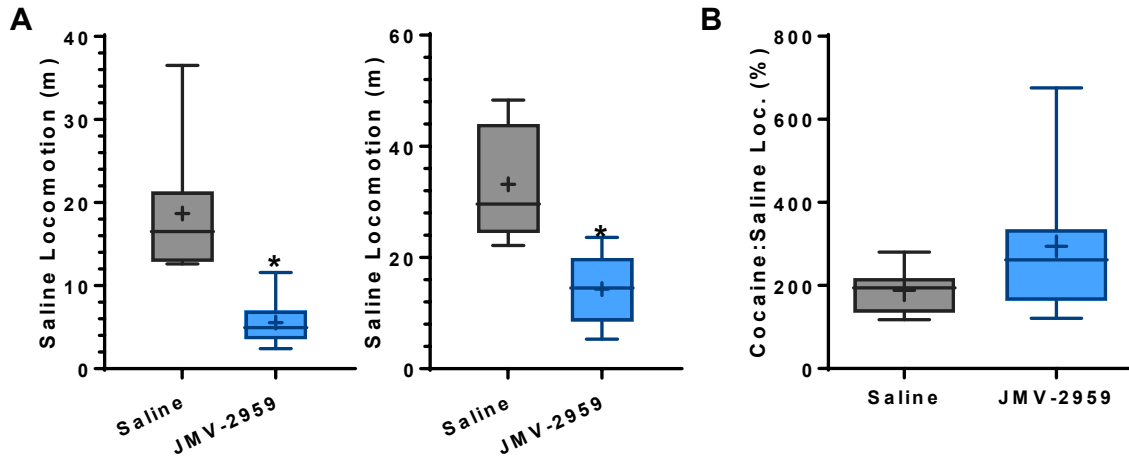

Supplemental Figure 2. Locomotor effects of JM V-2959. A) A) Locomotor activity after treatment with saline [Student's t-test ( $P = 0.0007$ ,  $* p < 0.05$  vs. Saline)] or cocaine (20 mg/kg; [Student's t-test ( $P = 0.0005$ ,  $* p < 0.05$  vs. Saline)] in the presence of saline pretreatment ( $n = 8$ ), vaccination with KLH ( $n = 9$ ), or Ghr1-KLH ( $n = 9$ ). B) Percent increase in cocaine locomotion compared to saline baseline [One-way ANOVA ( $P = 0.9145$ ,  $F_{2,27} = 0.09$ )]. Data are shown as median with quartiles  $\pm$  5-95% CI; +, mean.

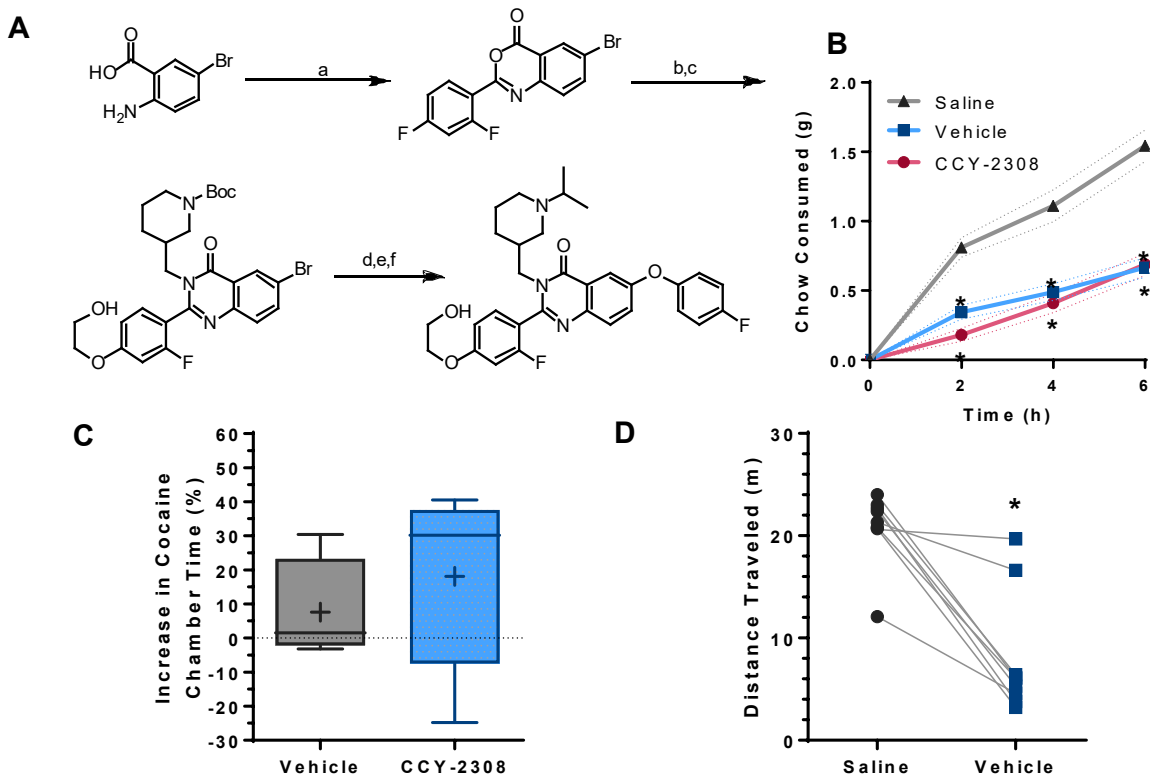

Supplemental Figure 3. Effect of CCY-2308-mediated GHSR<sub>1a</sub> antagonism on feeding and cocaine reward in mice. A) Synthetic route to access CCY-2308. Conditions: a-2,4-difluorobenzoyl chloride, Et<sub>3</sub>N, DCM, 23 °C, 2 h AcOH, 50 °C, 1.5 h (yield: 97%); b – Boc-(3-aminomethyl)piperidine, toluene, 130 °C, 4 h. c – Ethylene glycol, K<sub>2</sub>CO<sub>3</sub>, 140 °C, 8 h (yield: 11%). d-4-fluorophenol, Cs<sub>2</sub>CO<sub>3</sub>, Cu(I)Cl, dimethylglycine, NMP, 115 °C, 10 h. e – TFA, DCM, 23 °C, 4 h. f – 2-Iodopropane, K<sub>2</sub>CO<sub>3</sub>, ACN + 1% H<sub>2</sub>O, 80 °C, 10 h (yield: 29%). B) Chow consumption following acute treatment with saline (*n* = 5), vehicle (80:20 PEG 400:10 mM MeSO<sub>4</sub> in saline; *n* = 6), or CCY-2308 (30 mg/kg; *n* = 6) [Repeated measures two-way ANOVA (*P*<sub>interaction</sub> < 0.0001, *F*<sub>6, 75</sub> = 21.93; \**p* < 0.05 vs Saline, Bonferroni correction)]. C) Conditioned place preference for cocaine (20 mg/kg) in mice treated with vehicle (80:20 PEG 400:10 mM MeSO<sub>4</sub> in Saline; *n* = 4), or CCY-2308 (30 mg/kg; *n* = 5), [Student's *t*-test, (*P*=0.5080)]. Nine animals were removed from the study due to failure to meet the threshold of < 85 % of time in one chamber for exploration of the apparatus. D) Locomotor activity measured in the presence of saline (*n* = 9) or vehicle (*n* = 9) [Student's *t*-test (*P* = 0.004, \**p* < 0.05 vs. saline)]. Data shown as mean ± SEM (b), median with quartiles ± 5-95% CI; +, mean (c), or individual data points (d).

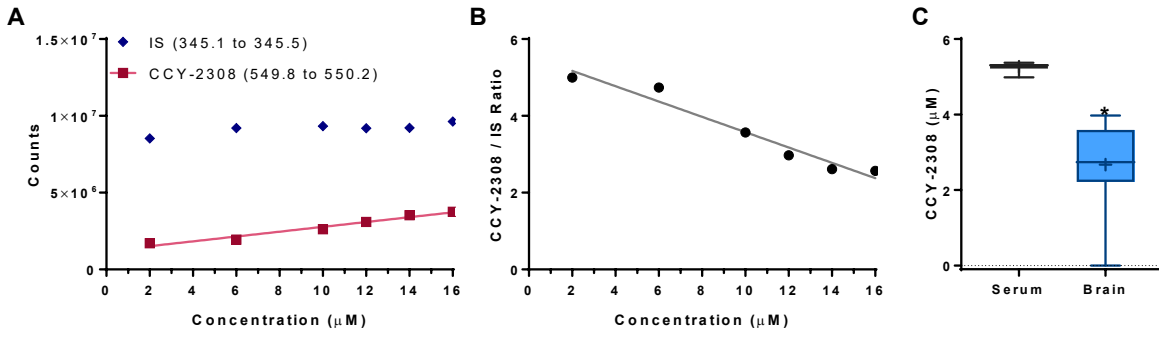

Supplemental Figure 4. Quantification of CCY-2308 in serum and blood. A) Mass spectrometric quantification of CCY-2308 and internal standard (IS) to generate standard curve. B) Ratios of CCY-2308/IS used to interpolate values onto standard curve. C) Serum ( $n = 10$ ) and brain ( $n = 10$ ) concentrations of CCY-2308. (Paired Student's t-test [ $P < 0.0001$ ]).
